# Supplementary material for: One-pot synthesis of CoFe2O4/graphene oxide hybrids and their conversion into FeCo/graphene hybrids for lightweight and highly efficient microwave absorber
Source: Royal Society of Chemistry journal article supplement (doi:10.1039/c4ta05718j), 2015-01-01
Supplement: c4ta05718j1.pdf [file c4ta05718j1.pdf]

## Supporting Information

### **One-Pot Synthesis of CoFe<sub>2</sub>O<sub>4</sub>/Graphene Oxide Hybrids and Their Conversion into FeCo/Graphene Hybrids for Lightweight and High Efficient Microwave Absorber**

*Xinghua Li, Juan Feng, Yaping Du, Jintao Bai, Haiming Fan\*, Haoli Zhang, Yong Peng\*, Fashen Li*

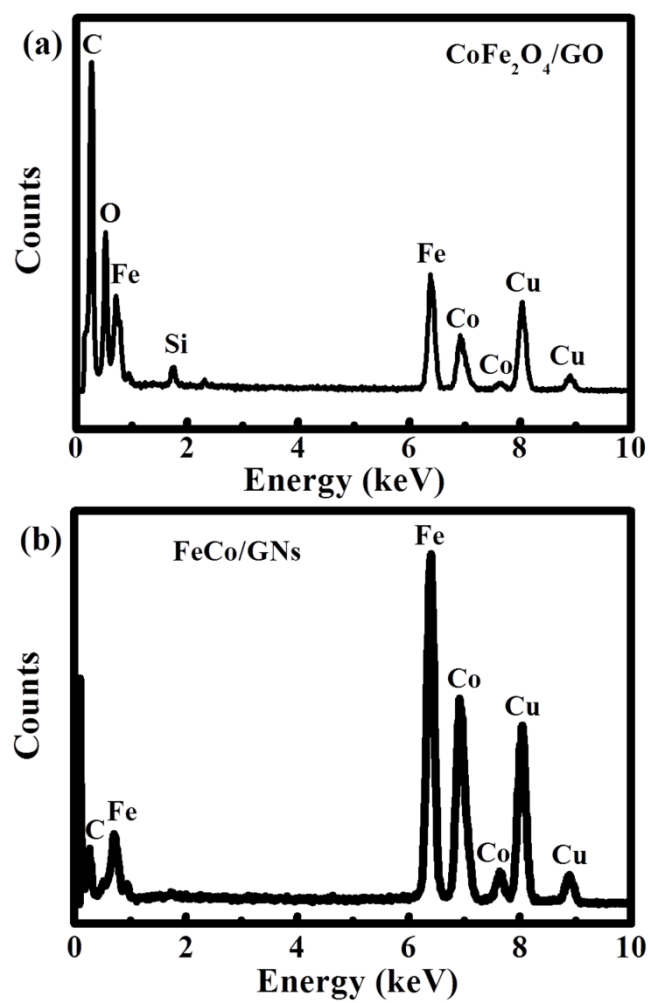

Figure S1 EDX spectra of (a)  $\text{CoFe}_2\text{O}_4/\text{GO}$  and (b)  $\text{FeCo}/\text{graphene}$  hybrids

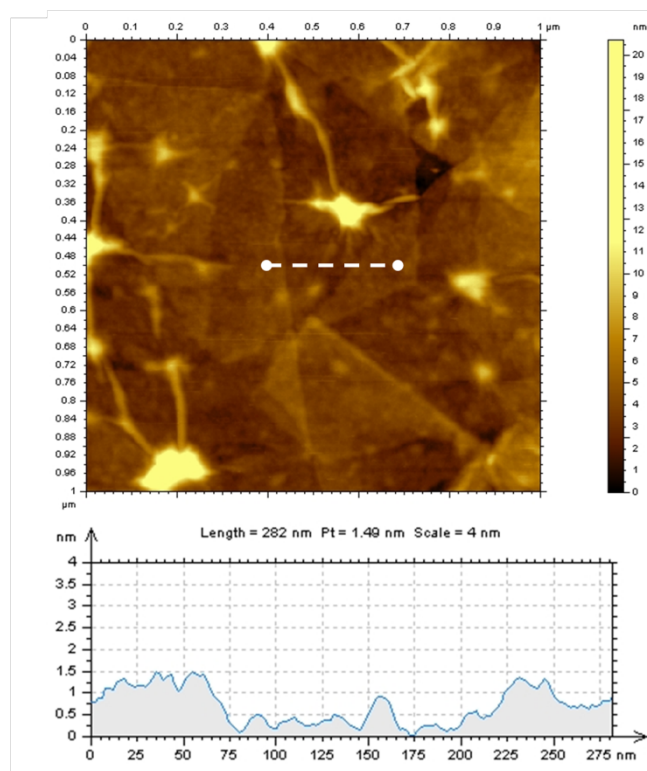

Figure S2 AFM image of GO

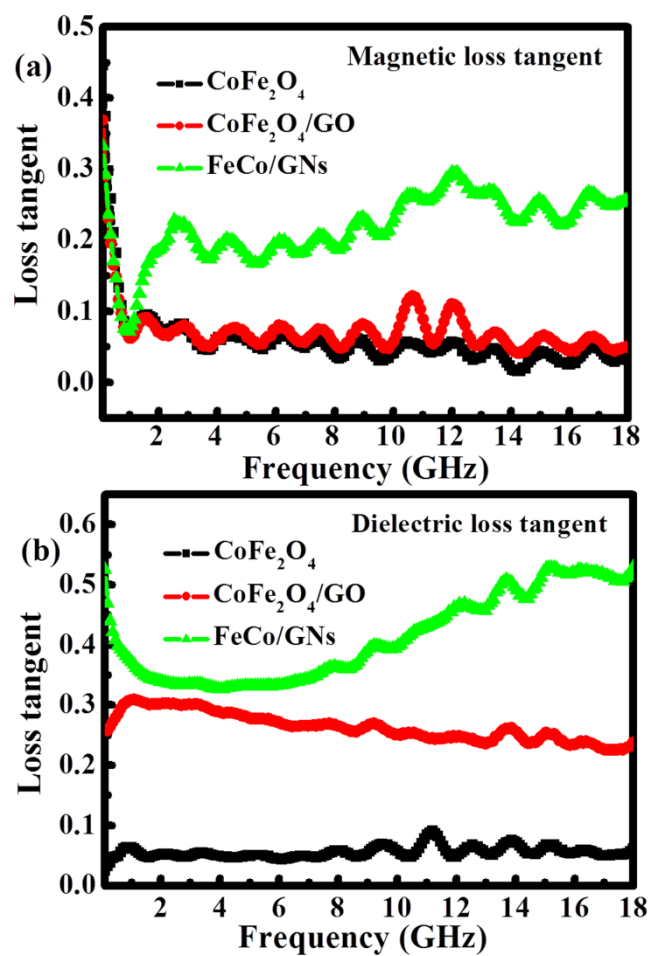

Figure S3 Frequency dependence of (a) magnetic loss tangent and (b) dielectric loss tangent of pure  $\text{CoFe}_2\text{O}_4$  nanocrystals,  $\text{CoFe}_2\text{O}_4/\text{GO}$  and  $\text{FeCo}/\text{graphene}$  hybrids

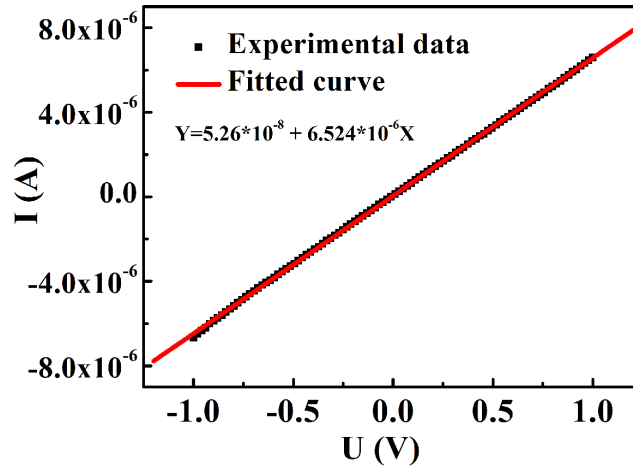

Fig. S4 The U-I curve for the CoFe<sub>2</sub>O<sub>4</sub>/GO hybrids

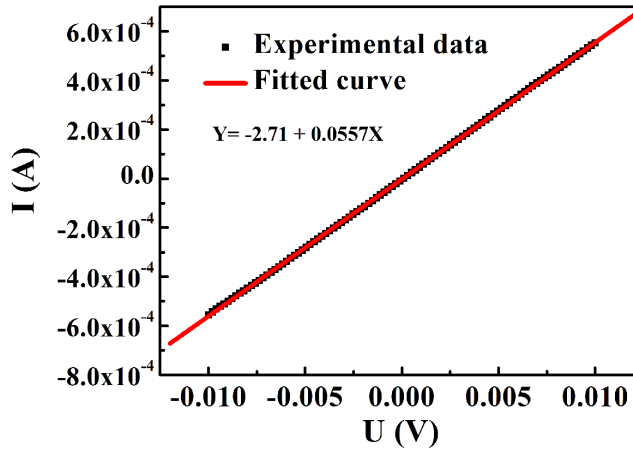

Fig. S5 The U-I curve for the FeCo/GNs hybrids

We have measured the conductivity by four-point probe technique, a standard programmable DC voltage/current detector. Both the CoFe<sub>2</sub>O<sub>4</sub>/GO and FeCo/GNs hybrids were pressed into toroidal shape with outer diameter of 7.00 mm and inner diameter of 3.04 mm for the measurement of their conductivities. The thickness of CoFe<sub>2</sub>O<sub>4</sub>/GO and FeCo/GNs hybrids is 3.96 mm and 1.28 mm, respectively. Fig. S4 and S5 show the U-I curves for the CoFe<sub>2</sub>O<sub>4</sub>/GO and FeCo/GNs hybrids, respectively. It is clear that both the curves show the linear relationship. The conductivities ( $\sigma$ ) for the CoFe<sub>2</sub>O<sub>4</sub>/GO and FeCo/GNs hybrids are calculated to be about  $8.28 \times 10^{-4}$  and  $2.93 \text{ S m}^{-1}$ , respectively.

The skin depth ( $\delta$ ) of the CoFe<sub>2</sub>O<sub>4</sub>/GO and FeCo/GNs hybrids were obtained using the following equation:

$$\delta = \sqrt{\frac{1}{\pi f \mu_0 \mu_i \sigma}}$$

---

Where  $f$  is the frequency,  $\mu_0$  is the permeability of vacuum ( $4\pi \times 10^{-7}$ ),  $\mu_i$  is the relative permeability of hybrids and  $\sigma$  is the conductivity.

Here, we calculated the skin depth ( $\delta$ ) with the frequency at 1 GHz. Besides, we estimate the skin depth of the hybrids using the relative complex permeability of the paraffin-containing composite, since the contained paraffin doesn't influence the order of the complex permeability.

For CoFe<sub>2</sub>O<sub>4</sub>/GO hybrids,  $\mu_i$  is about 1.24 at 1GHz. The skin depth ( $\delta$ ) is about 0.5 m.

For FeCo/GNs hybrids,  $\mu_i$  is about 1.82 at 1GHz. The skin depth ( $\delta$ ) is about  $7 \times 10^{-3}$  m.
